# Supplementary material for: Host plant affects morphometric variation of Diaphorina citri (Hemiptera: Liviidae)
Source: PeerJ. 2016 Nov 3;4:e2663. doi: 10.7717/peerj.2663 (PMC5101605; doi:10.7717/peerj.2663)
Supplement: Supplemental Information 1 [file peerj-04-2663-s001.xlsx]

## Sheet: hostplants lab (traditional-log
Dot	Sex	Plant	lwl	lww	lt	lgcl	lgcw	l2t5	l5t6	l5t8	l6t7	l6t9	l8t11	l3t12
Dot	female	Murrayapaniculata	0.360877	-0.0459988	-0.332547	-0.718967	-0.901356	-0.558177	-0.12078	-0.0111737	-0.762358	-0.293102	-0.198735	0.120077
Dot	female	Murrayapaniculata	0.319626	-0.0644927	-0.328827	-0.742321	-0.952725	-0.60001	-0.165327	-0.0581857	-0.748988	-0.343165	-0.246801	0.0670763
Dot	female	Murrayapaniculata	0.29281	-0.0931265	-0.328827	-0.783834	-0.958607	-0.567329	-0.210987	-0.0909868	-0.82021	-0.354349	-0.257874	0.0520515
Dot	female	Murrayapaniculata	0.30103	-0.0835461	-0.341989	-0.793174	-0.952725	-0.53919	-0.201677	-0.0774402	-0.815384	-0.350202	-0.250211	0.0611338
Dot	female	Murrayapaniculata	0.313234	-0.0402433	-0.419645	-0.681937	-0.935542	-0.62036	-0.17519	-0.0348576	-0.729483	-0.365836	-0.294079	0.0667736
Dot	female	Murrayapaniculata	0.319106	-0.0867161	-0.357041	-0.697886	-0.922632	-0.596065	-0.177025	-0.0571663	-0.7558	-0.330301	-0.220784	0.0885201
Dot	female	Murrayapaniculata	0.331731	-0.047692	-0.490687	-0.744727	-0.917215	-0.624924	-0.142534	-0.0380896	-0.809457	-0.328458	-0.215435	0.0968635
Dot	female	Murrayapaniculata	0.307389	-0.126389	-0.336299	-0.849244	-0.966576	-0.560097	-0.204495	-0.0774539	-0.779211	-0.388102	-0.249383	0.0705024
Dot	female	Murrayapaniculata	0.324694	-0.093665	-0.374688	-0.811072	-0.911864	-0.568664	-0.174192	-0.0480181	-0.790535	-0.356081	-0.245816	0.0824667
Dot	female	Murrayapaniculata	0.294797	-0.0883098	-0.397397	-0.74958	-1	-0.643849	-0.198136	-0.0663785	-0.846756	-0.336153	-0.265764	0.0588254
Dot	female	Murrayapaniculata	0.31133	-0.0827571	-0.3711	-0.783834	-0.910095	-0.623407	-0.176912	-0.0579908	-0.791461	-0.340935	-0.247903	0.0674461
Dot	female	Murrayapaniculata	0.256237	-0.0999061	-0.406714	-0.797239	-0.9914	-0.610832	-0.194889	-0.0868346	-0.826968	-0.475623	-0.384547	0.00325891
Dot	female	Murrayapaniculata	0.339153	-0.0670192	-0.450384	-0.696804	-0.97265	-0.611551	-0.147326	-0.0290995	-0.772761	-0.33188	-0.210219	0.0959618
Dot	female	Citrusmaxima	0.329703	-0.0718603	-0.364014	-0.742321	-0.917215	-0.616936	-0.155627	-0.0182781	-0.775256	-0.336777	-0.241273	0.0938404
Dot	female	Citrusmaxima	0.294466	-0.0856568	-0.349692	-0.822464	-0.924453	-0.582419	-0.209438	-0.0616766	-0.787615	-0.35379	-0.304206	0.0536716
Dot	female	Citrusmaxima	0.308564	-0.0775341	-0.381429	-0.801343	-0.937418	-0.62036	-0.191591	-0.0557574	-0.802438	-0.363666	-0.235201	0.0697813
Dot	female	Citrusmaxima	0.347428	-0.0280287	-0.32468	-0.794525	-0.924453	-0.631165	-0.120879	0.0120297	-0.775352	-0.316624	-0.245033	0.091497
Dot	female	Citrusmaxima	0.333145	-0.0572481	-0.335358	-0.832683	-0.911864	-0.608646	-0.15646	-0.0200332	-0.764987	-0.325186	-0.223367	0.101834
Dot	female	Citrusmaxima	0.284092	-0.19382	-0.385103	-0.88941	-1.00436	-0.555786	-0.239218	-0.0872435	-1.00615	-0.387847	-0.290665	0.0453036
Dot	female	Citrusmaxima	0.31576	-0.112664	-0.348238	-0.707744	-0.924453	-0.670771	-0.141125	-0.0176693	-0.761736	-0.342035	-0.244953	0.0810803
Dot	female	Citrusmaxima	0.313656	-0.0754623	-0.511449	-0.779892	-1.01323	-0.568368	-0.17222	-0.0529767	-0.80724	-0.36117	-0.247459	0.0688592
Dot	female	Citrusmaxima	0.337958	-0.0577438	-0.326979	-0.758205	-0.917215	-0.59596	-0.148415	-0.0291939	-0.744772	-0.316359	-0.210647	0.099286
Dot	female	Citrusmaxima	0.271842	-0.181774	-0.444301	-0.835647	-0.958607	-0.635579	-0.201053	-0.0777248	-0.798368	-0.393093	-0.340274	0.03023
Dot	female	Citrusmaxima	0.271144	-0.110698	-0.400117	-0.910095	-0.968592	-0.602239	-0.214171	-0.0982058	-0.780807	-0.357627	-0.272191	0.0383916
Dot	female	Citrusmaxima	0.33706	-0.110698	-0.342466	-0.843148	-0.935542	-0.543671	-0.142733	-0.0177017	-0.71306	-0.304246	-0.228349	0.089241
Dot	female	Citrusmaxima	0.308671	-0.0952845	-0.321027	-0.778586	-0.91364	-0.564181	-0.164735	-0.0517465	-0.813552	-0.344109	-0.274562	0.0628035
Dot	female	Citrusmaxima	0.337559	-0.0710923	-0.338661	-0.743523	-0.946922	-0.5923	-0.140575	-0.00975785	-0.776462	-0.337296	-0.248356	0.0850953
Dot	female	Citrusmaxima	0.324591	-0.0649968	-0.348722	-0.779892	-0.980884	-0.800639	-0.307616	-0.193855	-0.903794	-0.480818	-0.358785	-0.0781345
Dot	female	Citrusmaxima	0.284431	-0.190777	-0.376234	-0.866461	-0.987163	-0.56556	-0.24224	-0.0886098	-0.97307	-0.396285	-0.293328	0.0431999
Dot	female	Citrusaurantiifolia	0.312389	-0.0907115	-0.334888	-0.843148	-0.96457	-0.603193	-0.179894	-0.0594465	-0.788867	-0.358498	-0.238414	0.068293
Dot	female	Citrusaurantiifolia	0.293915	-0.0988142	-0.374173	-0.812479	-0.950782	-0.625527	-0.189774	-0.0494961	-0.824795	-0.365266	-0.28903	0.0697992
Dot	female	Citrusaurantiifolia	0.274389	-0.102373	-0.338187	-0.794525	-0.935542	-0.590558	-0.222677	-0.100551	-0.785634	-0.357428	-0.290697	0.0356649
Dot	female	Citrusaurantiifolia	0.332337	-0.102373	-0.343902	-0.748362	-0.901356	-0.540624	-0.151088	-0.0236449	-0.762749	-0.33881	-0.249394	0.0871503
Dot	female	Citrusaurantiifolia	0.262214	-0.123782	-0.400117	-0.798603	-0.976748	-0.590391	-0.239872	-0.081811	-0.837245	-0.393561	-0.370434	0.0217556
Dot	female	Citrusaurantiifolia	0.319938	-0.0770152	-0.317855	-0.876148	-0.939302	-0.589116	-0.172841	-0.0259113	-0.772659	-0.343767	-0.286089	0.0615594
Dot	female	Citrusaurantiifolia	0.306639	-0.0979971	-0.368049	-0.860121	-0.928118	-0.649762	-0.177756	-0.0523861	-0.766918	-0.331001	-0.252632	0.0599379
Dot	female	Citrusaurantiifolia	0.330819	-0.069051	-0.338661	-0.774691	-0.924453	-0.538876	-0.157631	-0.0287352	-0.764804	-0.359681	-0.259348	0.0872092
Dot	female	Citrusaurantiifolia	0.323768	-0.0775341	-0.364014	-0.752027	-0.922632	-0.62457	-0.173674	-0.0436542	-0.784533	-0.322525	-0.217104	0.0825552
Dot	female	Citrusaurantiifolia	0.313445	-0.108463	-0.375202	-0.852324	-0.908333	-0.57319	-0.177234	-0.0589972	-0.825026	-0.343601	-0.236143	0.0754477
Dot	female	Citrusaurantiifolia	0.320665	-0.0734003	-0.33208	-0.715569	-0.91364	-0.468988	-0.193376	-0.048925	-0.773045	-0.354898	-0.286738	0.0731234
Dot	female	Citrusaurantiifolia	0.326848	-0.0757207	-0.356547	-0.747147	-0.89449	-0.58699	-0.176604	-0.0264477	-0.75894	-0.332424	-0.255985	0.0786013
Dot	female	Citrusaurantiifolia	0.311542	-0.093665	-0.359519	-0.813892	-0.939302	-0.597213	-0.209688	-0.058844	-0.74159	-0.340744	-0.243471	0.074624
Dot	female	Citrusaurantiifolia	0.331731	-0.119186	-0.375718	-0.838632	-0.941195	-0.577067	-0.138811	-0.0257446	-0.781192	-0.346375	-0.211846	0.0914588
Dot	female	Citrusaurantiifolia	0.268812	-0.132238	-0.41005	-0.856985	-1.02228	-0.648443	-0.24374	-0.0903817	-0.797087	-0.353384	-0.293767	0.021421
Dot	female	Citrusaurantiifolia	0.309949	-0.0859214	-0.365523	-0.77083	-0.943095	-0.605919	-0.193711	-0.063505	-0.788257	-0.35204	-0.238272	0.0720484
Dot	female	Bergerakoenigii	0.275427	-0.120904	-0.431212	-0.904831	-1.00656	-0.627104	-0.233683	-0.0894157	-0.802853	-0.341605	-0.30041	0.0271035
Dot	female	Bergerakoenigii	0.269396	-0.104854	-0.388808	-0.956638	-1.02457	-1.15437	-0.748551	-0.622893	-1.51977	-0.928537	-0.823966	-0.529567
Dot	female	Bergerakoenigii	0.322426	-0.0990869	-0.383	-0.818156	-0.915424	-0.610086	-0.175847	-0.0642685	-0.75403	-0.356601	-0.210844	0.0936855
Dot	female	Bergerakoenigii	0.272538	-0.119758	-0.438302	-0.825359	-0.970616	-0.568851	-0.243702	-0.102222	-0.892133	-0.393617	-0.295734	0.0290379
Dot	female	Bergerakoenigii	0.274389	-0.119472	-0.365019	-0.818156	-0.933674	-0.633247	-0.231632	-0.101945	-0.775168	-0.395871	-0.293234	0.0258974
Dot	female	Bergerakoenigii	0.288137	-0.105961	-0.369064	-0.794525	-0.928118	-0.581793	-0.250617	-0.0961781	-0.772604	-0.3221	-0.274946	0.0349386
Dot	female	Bergerakoenigii	0.325926	-0.0627329	-0.386687	-0.778586	-0.937418	-0.586231	-0.151461	-0.0292801	-0.757203	-0.359034	-0.221841	0.0994721
Dot	female	Bergerakoenigii	0.294797	-0.127844	-0.381952	-0.825359	-0.9914	-0.632734	-0.177761	-0.0516839	-0.830319	-0.395101	-0.283242	0.063117
Dot	female	Bergerakoenigii	0.296556	-0.091247	-0.377268	-0.911864	-1.01323	-0.605285	-0.215334	-0.063097	-0.786647	-0.339354	-0.266823	0.0581126
Dot	female	Bergerakoenigii	0.322323	-0.069051	-0.321937	-0.769551	-0.89279	-0.639841	-0.153838	-0.0368267	-0.723482	-0.341095	-0.228583	0.0933933
Dot	female	Bergerakoenigii	0.315235	-0.0861861	-0.345823	-0.755723	-0.956638	-0.54895	-0.185722	-0.0542806	-0.859456	-0.356448	-0.2587	0.0768009
Dot	female	Bergerakoenigii	0.248709	-0.106793	-0.432974	-0.920819	-1.00218	-0.681847	-0.257816	-0.096648	-0.752561	-0.340526	-0.31378	0.0269205
Dot	female	Bergerakoenigii	0.232996	-0.174574	-0.417937	-0.910095	-1.02919	-0.592678	-0.286496	-0.144714	-0.810813	-0.429352	-0.339971	-0.0152763
Dot	female	Bergerakoenigii	0.307068	-0.106516	-0.371611	-0.736364	-0.937418	-0.621397	-0.199202	-0.0687626	-0.755567	-0.33775	-0.231018	0.0608066
Dot	female	Bergerakoenigii	0.34183	-0.0455163	-0.37366	-0.856985	-0.939302	-0.560585	-0.159465	-0.0395476	-0.73387	-0.316225	-0.208055	0.0995345
Dot	female	Bergerakoenigii	0.284318	-0.118615	-0.380907	-0.856985	-0.97265	-0.59206	-0.239283	-0.0853231	-0.742465	-0.328907	-0.271783	0.0432585
Dot	female	Citrustaiwanica	0.250664	-0.11833	-0.446117	-0.941195	-0.987163	-0.67204	-0.240635	-0.122577	-0.837967	-0.395743	-0.283394	0.0249782
Dot	female	Citrustaiwanica	0.259474	-0.134896	-0.415669	-0.917215	-1.02457	-1.32983	-0.895988	-0.823767	-0.816287	-0.983063	-1.40611	-1.05431
Dot	female	Citrustaiwanica	0.283753	-0.118901	-0.399572	-0.901356	-1.01773	-0.61489	-0.245359	-0.112595	-0.79898	-0.388855	-0.290476	0.0216521
Dot	female	Citrustaiwanica	0.267758	-0.13638	-0.447332	-0.89449	-1.011	-1.25794	-0.871178	-0.974282	-0.83313	-0.864156	-1.0444	-1.02314
Dot	female	Citrustaiwanica	0.293252	-0.103198	-0.415104	-0.98506	-1.03621	-0.650465	-0.226924	-0.10722	-0.857772	-0.395977	-0.292902	0.0260367
Dot	female	Citrustaiwanica	0.318063	-0.0629839	-0.368556	-0.926282	-0.96457	-0.59617	-0.237139	-0.0942228	-0.78857	-0.361988	-0.289004	0.0345051
Dot	female	Citrustaiwanica	0.276921	-0.0999061	-0.385103	-0.90309	-0.976748	-1.69197	-1.05385	-0.727332	-0.840707	-1.0288	-1.50922	-0.763028
Dot	female	Citrustaiwanica	0.258757	-0.125808	-0.415104	-0.945004	-0.993534	-0.666389	-0.233578	-0.105183	-0.809317	-0.389874	-0.306385	0.0287261
Dot	female	Citrustaiwanica	0.279895	-0.0933956	-0.355561	-0.980884	-1.02228	-0.637514	-0.224272	-0.0849978	-0.818454	-0.368367	-0.277345	0.0339496
Dot	female	Citrustaiwanica	0.281828	-0.113791	-0.411728	-0.91364	-0.929962	-0.630284	-0.2407	-0.0923481	-0.821744	-0.375059	-0.305658	0.0198167
Dot	female	Citrustaiwanica	0.284882	-0.0988142	-0.41005	-0.85855	-0.946922	-0.646572	-0.19682	-0.0707838	-0.755887	-0.389049	-0.300722	0.0248878
Dot	female	Citrustaiwanica	0.229042	-0.174574	-0.403403	-1.13668	-1.01547	-1.27571	-0.865359	-0.967612	-0.877362	-0.982318	-1.24233	-1.1276
Dot	female	Citrustaiwanica	0.294356	-0.0840728	-0.382475	-0.987163	-1.05061	-0.629111	-0.256409	-0.0960357	-0.799835	-0.358164	-0.296921	0.0270726
Dot	female	Citrustaiwanica	0.254064	-0.1346	-0.452225	-0.868061	-1.01323	-0.630284	-0.257863	-0.111681	-0.810813	-0.382544	-0.323337	0.0138018
Dot	female	Citrustaiwanica	0.268227	-0.137869	-0.436519	-1.01323	-0.978811	-0.616035	-0.256523	-0.104099	-0.828683	-0.397717	-0.359358	0.00522308
Dot	female	Citrusmacrophyla	0.262451	-0.115205	-0.316953	-0.798603	-0.962574	-0.545107	-0.248466	-0.127376	-0.797987	-0.357153	-0.298044	0.0056037
Dot	female	Citrusmacrophyla	0.277838	-0.149967	-0.329754	-0.853872	-0.860121	-0.605518	-0.254362	-0.095012	-0.843307	-0.344706	-0.264448	0.0497758
Dot	female	Citrusmacrophyla	0.319314	-0.0809219	-0.444906	-0.872895	-0.974694	-0.612543	-0.155016	-0.0326955	-0.761796	-0.372656	-0.241648	0.083902
Dot	female	Citrusmacrophyla	0.31576	-0.102923	-0.423659	-0.79588	-0.995679	-0.558004	-0.176509	-0.0364253	-0.793921	-0.354773	-0.268197	0.0691037
Dot	female	Citrusmacrophyla	0.305136	-0.0877779	-0.35164	-0.718967	-0.939302	-0.544501	-0.211765	-0.0701361	-0.754521	-0.345802	-0.24626	0.0727141
Dot	female	Citrusmacrophyla	0.320146	-0.0700704	-0.379864	-0.91364	-1.08092	-0.600758	-0.15727	-0.0298548	-0.799371	-0.333796	-0.238981	0.0980021
Dot	female	Citrusmacrophyla	0.303196	-0.116339	-0.392545	-0.774691	-1.02687	-0.551904	-0.210994	-0.0574867	-0.7993	-0.336091	-0.270995	0.0527624
Dot	female	Citrusmacrophyla	0.295127	-0.110698	-0.368556	-0.818156	-0.962574	-0.57806	-0.181189	-0.0592343	-0.786647	-0.366588	-0.289674	0.0604748
Dot	female	Citrusmacrophyla	0.288696	-0.121478	-0.332547	-0.924453	-0.950782	-0.631464	-0.202555	-0.0608238	-0.817174	-0.383832	-0.302524	0.0495917
