# Supplementary material for: Host plant affects morphometric variation of Diaphorina citri (Hemiptera: Liviidae)
Source: PeerJ. 2016 Nov 3;4:e2663. doi: 10.7717/peerj.2663 (PMC5101605; doi:10.7717/peerj.2663)
Supplement: Supplemental Information 2 — Table S2. Landmark values for geometric morphometric analysis for Asian citrus psyllids reared on different host plants. [file peerj-04-2663-s002.xlsx]

## Sheet: hostplants lab (geometric)
ID-Hostplant-	Plant	Sex	BodyColor	Landmark1x	Landmark1y	Landmark2x	Landmark2y	Landmark3x	Landmark3y	Landmark4x	Landmark4y	Landmark5x	Landmark5y	Landmark6x	Landmark6y	Landmark7x	Landmark7y	Landmark8x	Landmark8y	Landmark9x	Landmark9y	Landmark10x	Landmark10y	Landmark11x	Landmark11y
989	Murrayapaniculata	female	brown	1.21138	0.969512	1.73984	1.10772	1.86179	1.23984	1.48374	0.914634	2.06911	0.695122	2.05691	0.526423	2.31911	0.936992	2.42276	0.489837	2.63821	0.560976	2.85976	0.78252	2.90244	0.979675
990	Murrayapaniculata	female	brown	2.22561	0.928862	1.73577	0.760163	1.65041	0.628049	1.95122	0.979675	1.38821	1.1565	1.4126	1.29268	1.15447	0.906504	1.01829	1.30285	0.857724	1.23577	0.654472	1.01626	0.615854	0.788618
991	Murrayapaniculata	female	brown	1.16667	1.48984	1.6687	1.63008	1.75	1.78252	1.40244	1.43293	2.0061	1.21138	1.96951	1.07114	2.22561	1.46341	2.29065	1.03862	2.43293	1.10976	2.61789	1.35366	2.66057	1.5061
995	Murrayapaniculata	female	brown	1.0935	1.12805	1.61179	1.23171	1.71951	1.36179	1.29878	1.05691	1.87398	0.780488	1.85976	0.636179	2.16057	1.02033	2.29472	0.589431	2.47764	0.670732	2.67683	0.859756	2.74187	1.08537
996	Murrayapaniculata	female	brown	2.12805	1.2378	1.57114	1.10163	1.44106	0.926829	1.88618	1.30285	1.27642	1.55691	1.29065	1.73577	0.971545	1.29065	0.912602	1.77236	0.721545	1.69512	0.481707	1.4065	0.422764	1.20732
997	Murrayapaniculata	female	brown	2.30285	1.30081	1.86382	1.4065	1.78862	1.54065	2.09146	1.24187	1.60976	1.03049	1.62195	0.902439	1.36992	1.2561	1.29065	0.871951	1.08537	0.947154	0.906504	1.14634	0.859756	1.33537
1002	Murrayapaniculata	female	brown	1.25407	1.18699	1.79065	1.31504	1.85976	1.38821	1.54472	1.12602	2.10569	0.941057	2.0813	0.79878	2.33537	1.19715	2.50203	0.806911	2.65447	0.896341	2.81707	1.09553	2.84553	1.28455
1004	Murrayapaniculata	female	brown	1.10163	0.95935	1.65854	0.841463	1.80285	0.697154	1.36585	1.03049	1.9878	1.27236	1.97358	1.43089	2.2622	1.03455	2.37805	1.46951	2.55894	1.4187	2.80488	1.19512	2.86585	0.965447
1008	Murrayapaniculata	female	green	2.16463	1.09756	1.6565	0.934959	1.53252	0.796748	1.9065	1.14634	1.3252	1.32317	1.3374	1.46545	1.10569	1.05894	0.928862	1.44715	0.752033	1.37602	0.554878	1.14228	0.536585	0.918699
1009	Murrayapaniculata	female	brown	2.1748	0.97561	1.64228	1.10163	1.5061	1.25203	1.94919	0.912602	1.33537	0.666667	1.3313	0.502033	1.06911	0.912602	0.912602	0.48374	0.723577	0.571138	0.520325	0.800813	0.481707	1.02236
1010	Murrayapaniculata	female	brown	2.45732	0.916667	1.97358	0.845528	1.81707	0.689024	2.21951	1.01016	1.62602	1.27439	1.64634	1.4126	1.35976	1.04878	1.25407	1.4126	1.13008	1.37602	0.943089	1.17683	0.873984	0.981707
1011	Murrayapaniculata	female	brown	2.22967	1.05081	1.69512	0.912602	1.60772	0.813008	1.97358	1.11179	1.37195	1.31707	1.37398	1.45732	1.14837	1.05488	0.97561	1.47358	0.796748	1.42073	0.567073	1.19715	0.51626	0.985772
1012	Murrayapaniculata	female	brown	2.18089	1.15447	1.6748	1.02236	1.55488	0.892276	1.93089	1.22358	1.38008	1.43089	1.37805	1.52439	1.11382	1.20122	1.00407	1.5752	0.853659	1.54268	0.654472	1.35163	0.573171	1.14634
1016	Murrayapaniculata	female	brown	0.855691	1.03049	1.39431	0.772358	1.49187	0.577236	1.15854	1.03659	1.82317	1.10366	1.83333	1.27439	1.97358	0.79065	2.29065	1.17073	2.43699	1.05285	2.5813	0.770325	2.58333	0.563008
1017	Murrayapaniculata	female	brown	0.977642	1.14228	1.53252	1.14228	1.70325	1.25407	1.21138	1.01626	1.75407	0.664634	1.68089	0.526423	2.11789	0.823171	2.10976	0.396341	2.28455	0.422764	2.55285	0.601626	2.66667	0.764228
1018	Murrayapaniculata	female	green	1.0874	1.19309	1.5935	1.43293	1.69512	1.63821	1.33333	1.18293	2.0122	1.08333	2.05488	0.914634	2.18293	1.38211	2.44919	0.97561	2.5935	1.0813	2.75407	1.36179	2.74593	1.60163
1022	Murrayapaniculata	female	green	0.686992	1.28252	1.21545	1.47764	1.3374	1.63618	0.96748	1.24797	1.5813	1.10366	1.57724	0.943089	1.81301	1.38821	2.02642	0.981707	2.20732	1.0874	2.36179	1.30285	2.4187	1.53049
1023	Murrayapaniculata	female	brown	1.19106	1.31301	1.72561	1.28252	1.91667	1.37805	1.41667	1.18496	1.94715	0.794715	1.88618	0.632114	2.26016	0.989837	2.28659	0.479675	2.47358	0.495935	2.76829	0.678862	2.88211	0.859756
1024	Murrayapaniculata	female	green	2.33537	1.53455	1.7622	1.61382	1.60569	1.76016	2.11179	1.43293	1.46748	1.12602	1.5	0.963415	1.18089	1.35976	1.07724	0.876016	0.869919	0.926829	0.603659	1.15447	0.538618	1.35772
1029	Murrayapaniculata	female	brown	1.09959	0.884146	1.63618	0.705285	1.7378	0.542683	1.3252	0.924797	1.98171	1.11382	2.00407	1.27846	2.21748	0.823171	2.41057	1.27033	2.57114	1.17886	2.80081	0.914634	2.84756	0.719512
1030	Murrayapaniculata	female	brown	0.993902	1.21545	1.50203	1.3252	1.61992	1.48171	1.24593	1.13415	1.81098	0.890244	1.80285	0.739837	2.05894	1.13821	2.21138	0.693089	2.37195	0.754065	2.59553	0.985772	2.64024	1.20528
1031	Murrayapaniculata	female	brown	1.0061	1.22154	1.57724	1.32317	1.69106	1.45122	1.29268	1.13618	1.85976	0.871951	1.81301	0.727642	2.12398	1.11585	2.25407	0.650407	2.41463	0.707317	2.67276	0.965447	2.71138	1.13211
1032	Murrayapaniculata	female	green	0.945122	1.21951	1.52439	1.04878	1.64837	0.884146	1.21545	1.27642	1.93089	1.5122	1.94106	1.68699	2.18496	1.21951	2.4065	1.68902	2.60366	1.59553	2.80894	1.34146	2.8435	1.08537
1034	Murrayapaniculata	female	green	2.31504	1.80285	1.77236	1.92073	1.64837	2.08333	2.08333	1.72561	1.42683	1.41667	1.44715	1.27236	1.16667	1.70528	1.0061	1.22967	0.804878	1.31098	0.569106	1.57317	0.53252	1.80691
1037	Citrusmaxima	female	brown	1.04065	1.30488	1.61992	1.14228	1.73374	0.977642	1.29675	1.36179	1.97154	1.55488	1.97561	1.73984	2.22358	1.27236	2.41667	1.7378	2.60163	1.64837	2.82317	1.4065	2.88008	1.18496
1039	Citrusmaxima	female	green	2.1626	0.79878	1.54675	0.78252	1.39634	0.660569	1.90041	0.922764	1.27642	1.27642	1.30081	1.46951	0.957317	1.08943	0.892276	1.5813	0.739837	1.5752	0.46748	1.4065	0.400407	1.18699
1044	Citrusmaxima	female	brown	0.821138	1.10366	1.30285	1.32724	1.35772	1.47967	1.06301	1.08537	1.66463	0.985772	1.6687	0.821138	1.83943	1.25813	2.0874	0.857724	2.24187	0.979675	2.36992	1.20935	2.38415	1.43902
1046	Citrusmaxima	female	brown	1.96748	1.04065	1.4939	0.780488	1.43496	0.662602	1.69309	1.03252	1.05691	1.09959	1.05488	1.25203	0.855691	0.788618	0.605691	1.18902	0.485772	1.11382	0.29878	0.843496	0.308943	0.619919
1048	Citrusmaxima	female	brown	1.15854	0.914634	1.72967	0.932927	1.89837	0.827236	1.34146	1.04878	1.94106	1.47358	1.90244	1.64228	2.27846	1.29878	2.30285	1.78455	2.48374	1.78455	2.81098	1.60163	2.94309	1.42886
1051	Citrusmaxima	female	brown	0.900407	0.72561	1.46748	0.756098	1.60772	0.640244	1.12398	0.873984	1.63008	1.23374	1.5752	1.38821	1.96545	1.08537	1.96545	1.5122	2.10976	1.48577	2.37398	1.35366	2.51626	1.17886
1052	Citrusmaxima	female	brown	0.995935	1.38211	1.6626	1.39228	1.84553	1.52846	1.28862	1.25	1.92683	0.861789	1.85976	0.684959	2.28049	1.06911	2.32317	0.544715	2.53455	0.591463	2.83537	0.79878	2.93089	1.03252
1053	Citrusmaxima	female	brown	1.29472	1.57927	1.88821	1.64837	1.97561	1.78049	1.5	1.48577	2.09756	1.16667	2.07317	1.00813	2.40244	1.36789	2.45935	0.916667	2.66667	0.987805	2.89634	1.17073	2.99187	1.39634
1054	Citrusmaxima	female	brown	2.23577	1.38415	1.67683	1.16667	1.62195	1.02033	1.95122	1.39837	1.29268	1.55691	1.29878	1.70935	1.08537	1.28455	0.876016	1.73171	0.727642	1.65447	0.563008	1.40041	0.530488	1.21545
1057	Citrusmaxima	female	brown	0.943089	0.829268	1.43089	1.02033	1.4878	1.15447	1.17073	0.800813	1.79878	0.743902	1.81301	0.585366	1.98984	0.971545	2.19106	0.648374	2.30894	0.74187	2.44715	0.949187	2.49187	1.1565
1058	Citrusmaxima	female	brown	1.80894	1.22764	1.27846	0.973577	1.21138	0.821138	1.53659	1.22561	0.904472	1.30894	0.878049	1.46951	0.695122	1.00813	0.465447	1.40447	0.323171	1.30894	0.144309	1.0061	0.160569	0.808943
1059	Citrusmaxima	female	brown	2.20528	0.979675	1.5813	1.08943	1.39431	0.981707	2.00813	1.13821	1.45122	1.62602	1.53455	1.78862	1.09959	1.5061	1.18902	2.01016	1.0061	2.00813	0.672764	1.89024	0.495935	1.68902
1062	Citrusmaxima	female	brown	1.13211	1.47561	1.69919	1.31301	1.78049	1.17073	1.39431	1.53659	2.02236	1.75203	2.01016	1.90244	2.27439	1.48171	2.42683	1.92886	2.62398	1.83943	2.82927	1.59756	2.86382	1.38415
1066	Citrusmaxima	female	brown	2.51423	0.867886	2.02846	1.1748	1.95732	1.33333	2.29878	0.865854	1.56911	0.857724	1.54472	0.691057	1.38821	1.18496	1.13618	0.78252	0.989837	0.882114	0.827236	1.13415	0.845528	1.36585
1067	Citrusmaxima	female	brown	2.20122	1.19512	1.58943	1.26016	1.46748	1.17276	1.9878	1.34756	1.42683	1.80691	1.51423	1.94715	1.05285	1.62195	1.0935	2.12398	0.865854	2.09146	0.589431	1.94715	0.471545	1.7439
1068	Citrusmaxima	female	brown	2.18902	0.819106	1.72967	1.14228	1.70122	1.31504	1.95528	0.839431	1.31504	0.839431	1.25203	0.695122	1.15244	1.18496	0.878049	0.810976	0.715447	0.95122	0.573171	1.29878	0.623984	1.52846
1072	Citrusmaxima	female	green	2.06504	0.924797	1.43699	0.823171	1.34146	0.711382	1.79878	1.0061	1.15854	1.31911	1.18089	1.49593	0.851626	1.10366	0.75	1.5874	0.613821	1.56301	0.378049	1.36789	0.306911	1.16667
1074	Citrusmaxima	female	brown	2.05691	1.51016	1.47764	1.62195	1.37398	1.7622	1.82927	1.42683	1.18699	1.15244	1.20528	0.985772	0.867886	1.40041	0.78252	0.934959	0.595528	0.989837	0.327236	1.20732	0.254065	1.43496
1076	Citrusmaxima	female	brown	0.973577	1.19715	1.59959	1.21951	1.72154	1.0935	1.1626	1.33537	1.78252	1.76829	1.70732	1.91463	2.16057	1.57724	2.15854	2.07114	2.34553	2.03862	2.66667	1.8435	2.77033	1.59959
1080	Citrusmaxima	female	brown	2.23984	1.30691	1.72967	1.03659	1.64837	0.861789	1.99593	1.31911	1.30488	1.39837	1.29675	1.56707	1.0752	1.07927	0.853659	1.52439	0.693089	1.41463	0.477642	1.09553	0.489837	0.835366
1081	Citrusmaxima	female	brown	0.560976	1.71341	1.0813	1.41667	1.11585	1.2439	0.786585	1.69919	1.47764	1.68089	1.5061	1.84756	1.61992	1.34756	1.93699	1.73374	2.10163	1.57927	2.23577	1.27439	2.20325	1.05285
1082	Citrusmaxima	female	green	0.565041	1.29878	1.06301	1.47764	1.13211	1.61992	0.827236	1.24187	1.40244	1.1565	1.39431	1.05894	1.63821	1.38008	1.81301	1.07114	1.95325	1.09146	2.14837	1.30488	2.1748	1.53252
1084	Citrusmaxima	female	green	1.1687	1.22764	1.69512	1.30081	1.78455	1.42073	1.41463	1.12195	1.94919	0.908537	1.92073	0.817073	2.22764	1.08333	2.31707	0.743902	2.47154	0.727642	2.70325	0.888211	2.78049	1.10772
1182	Citrusaurantiifolia	female	brown	1.07724	1.35569	1.63211	1.46951	1.70935	1.54268	1.33537	1.29065	1.95935	1.05488	1.9248	0.910569	2.21138	1.28659	2.35569	0.837398	2.53455	0.902439	2.77033	1.12398	2.8313	1.34553
1183	Citrusaurantiifolia	female	brown	2.33333	1.15854	1.71545	1.03862	1.64634	0.936992	2.05488	1.23984	1.39228	1.5	1.44106	1.66057	1.10976	1.28049	1.01829	1.75813	0.813008	1.69919	0.581301	1.48984	0.51626	1.25813
1184	Citrusaurantiifolia	female	brown	1.97764	1.44512	1.48984	1.57114	1.39634	1.69919	1.78252	1.38618	1.21341	1.18699	1.24797	1.05285	0.926829	1.4065	0.865854	1.05081	0.682927	1.12398	0.520325	1.29065	0.47561	1.46545
1188	Citrusaurantiifolia	female	green	2.10772	1.13415	1.6626	0.957317	1.63008	0.861789	1.85772	1.18699	1.34959	1.29472	1.3252	1.46341	1.09959	1.08333	0.95935	1.46341	0.815041	1.39634	0.678862	1.18293	0.686992	0.943089
1190	Citrusaurantiifolia	female	brown	1.0752	1.40854	1.67276	1.52846	1.79065	1.64024	1.32927	1.3252	2.01016	1.06707	1.94309	0.910569	2.27033	1.35366	2.40854	0.861789	2.60772	0.934959	2.86789	1.20528	2.90041	1.40447
1194	Citrusaurantiifolia	female	brown	2.11179	1.03862	1.54878	0.961382	1.44715	0.835366	1.87398	1.12602	1.29065	1.39431	1.32317	1.55894	1.01016	1.1748	0.918699	1.63618	0.75	1.60366	0.465447	1.37195	0.382114	1.13821
1195	Citrusaurantiifolia	female	brown	0.810976	1.41057	1.41667	1.54675	1.53455	1.69919	1.09756	1.33943	1.73984	1.0752	1.65447	0.922764	2.03455	1.33333	2.12602	0.886179	2.25813	0.928862	2.56301	1.1748	2.63211	1.42073
1198	Citrusaurantiifolia	female	brown	1.00203	1.43699	1.51016	1.31301	1.61382	1.15041	1.21341	1.5061	1.83537	1.69715	1.83333	1.84146	2.0874	1.44309	2.21748	1.86992	2.40447	1.79268	2.61992	1.57927	2.64837	1.35976
1199	Citrusaurantiifolia	female	brown	1.1626	1.05894	1.7378	0.926829	1.87805	0.764228	1.39837	1.12195	2.03455	1.32724	2.02236	1.49593	2.30285	1.07724	2.46748	1.50813	2.64634	1.44309	2.90244	1.20732	2.94309	0.969512
1200	Citrusaurantiifolia	female	brown	2.25407	1.1687	1.73171	0.99187	1.67886	0.886179	2.00203	1.20732	1.38415	1.36789	1.40244	1.52439	1.11179	1.14837	0.932927	1.53455	0.839431	1.50203	0.672764	1.3313	0.601626	1.09756
1202	Citrusaurantiifolia	female	brown	2.49593	1.29878	1.90244	1.23171	1.78252	1.08333	2.25	1.38821	1.64228	1.65041	1.65854	1.8252	1.31301	1.4248	1.23577	1.88211	1.02439	1.80081	0.77439	1.58333	0.70935	1.34756
1206	Citrusaurantiifolia	female	brown	0.808943	1.25813	1.30691	1.35772	1.41057	1.5122	1.05488	1.18496	1.59553	0.97561	1.54675	0.837398	1.89024	1.19512	1.95732	0.79065	2.09959	0.863821	2.29472	1.06707	2.36992	1.25813
1207	Citrusaurantiifolia	female	brown	2.1748	1.24797	1.6687	1.13415	1.56707	1.02439	1.94512	1.3252	1.33943	1.54268	1.36992	1.68902	1.05894	1.31707	0.96748	1.75813	0.827236	1.70935	0.575203	1.49797	0.50813	1.25407
1208	Citrusaurantiifolia	female	brown	0.908537	1.35366	1.44919	1.48577	1.52439	1.60772	1.14024	1.29675	1.70325	1.09146	1.69512	0.955285	1.96138	1.30894	2.09756	0.949187	2.2378	1.02033	2.41667	1.20325	2.48171	1.40447
1211	Citrusaurantiifolia	female	brown	1.08943	1.03252	1.64837	0.857724	1.75	0.703252	1.3374	1.07927	1.96545	1.24797	1.97561	1.41463	2.21138	0.997967	2.37398	1.4248	2.54675	1.37398	2.77439	1.13415	2.82317	0.922764
1212	Citrusaurantiifolia	female	brown	2.09553	0.843496	1.55894	0.752033	1.46138	0.611789	1.89024	0.916667	1.26626	1.15854	1.28252	1.32927	1.00407	0.936992	0.873984	1.4065	0.705285	1.34146	0.46748	1.09553	0.416667	0.880081
1213	Citrusaurantiifolia	female	brown	1.19106	1.49593	1.71138	1.39228	1.81504	1.29065	1.40854	1.56504	1.93496	1.77236	1.94512	1.93293	2.21951	1.57724	2.33333	1.97358	2.52033	1.88008	2.71748	1.6748	2.7622	1.49593
1215	Citrusaurantiifolia	female	green	0.914634	0.953252	1.55691	1.05894	1.66667	1.21341	1.25	0.857724	1.8435	0.607724	1.79472	0.445122	2.15041	0.839431	2.21748	0.376016	2.39837	0.445122	2.62602	0.660569	2.72358	0.869919
1220	Citrusaurantiifolia	female	brown	0.813008	1.18902	1.4126	1.06911	1.4939	0.932927	1.05894	1.25813	1.67886	1.51016	1.64634	1.6748	2	1.25813	2.08333	1.71951	2.27033	1.63211	2.50203	1.39431	2.55894	1.18496
1221	Citrusaurantiifolia	female	brown	2.32317	1.37195	1.82724	1.22154	1.73577	1.06504	2.06707	1.42073	1.5	1.59553	1.5122	1.76016	1.28252	1.35569	1.10569	1.79065	0.973577	1.72967	0.792683	1.51016	0.747967	1.27236
1223	Citrusaurantiifolia	female	brown	2.14431	1.18699	1.61382	1.03049	1.52033	0.904472	1.90244	1.2622	1.31098	1.44715	1.31911	1.62602	1.03049	1.19919	0.906504	1.65447	0.71748	1.5813	0.473577	1.3374	0.430894	1.10772
1227	Bergerakoenigii	female	brown	2.46748	1.74797	1.93089	1.76829	1.79268	1.90244	2.2561	1.64228	1.73577	1.30894	1.75203	1.14634	1.39837	1.50407	1.35366	1.06098	1.16667	1.0813	0.898374	1.29268	0.813008	1.48374
1228	Bergerakoenigii	female	brown	1.50407	1.55691	2.02033	1.57724	2.1626	1.69919	1.68699	1.43089	2.2561	1.06911	2.14634	0.922764	2.56911	1.28862	2.65447	0.784553	2.84146	0.833333	3.08537	1.03252	3.16667	1.22764
1229	Bergerakoenigii	female	brown	2.40244	0.865854	1.84553	0.853659	1.71138	0.747967	2.1748	0.971545	1.62602	1.3252	1.67886	1.49593	1.33333	1.10569	1.26016	1.58537	1.10569	1.55691	0.788618	1.37805	0.674797	1.21138
1233	Bergerakoenigii	female	green	2.49593	1.15041	2.00813	0.865854	1.96341	0.682927	2.21951	1.15041	1.57724	1.22358	1.56504	1.35366	1.37805	0.878049	1.14228	1.28862	0.995935	1.18699	0.833333	0.902439	0.837398	0.642276
1234	Bergerakoenigii	female	brown	0.894309	1.22358	1.42276	1.26829	1.53659	1.35772	1.11382	1.12602	1.61382	0.841463	1.5813	0.719512	1.88618	1.04472	1.93496	0.666667	2.10976	0.658537	2.35772	0.837398	2.4187	1.01626
1235	Bergerakoenigii	female	brown	2.15041	1.26829	1.63008	1.02846	1.57724	0.910569	1.9065	1.28455	1.27642	1.37398	1.24797	1.54878	1.04878	1.0935	0.857724	1.47561	0.727642	1.41057	0.581301	1.1748	0.552846	0.947154
1237	Bergerakoenigii	female	brown	0.99187	1.32114	1.52033	1.34553	1.65447	1.44715	1.19919	1.22358	1.74797	0.861789	1.6748	0.727642	2.06504	1.02846	2.07317	0.626016	2.23984	0.646341	2.53252	0.808943	2.63415	1.03252
1241	Bergerakoenigii	female	brown	2.20732	1.34146	1.68699	1.38211	1.57317	1.5122	1.95528	1.25203	1.46748	0.943089	1.52033	0.821138	1.18699	1.12195	1.12602	0.739837	0.979675	0.764228	0.711382	0.934959	0.642276	1.18293
1243	Bergerakoenigii	female	brown	2.10569	1.32927	1.62195	1.14228	1.55691	1.02439	1.90244	1.36585	1.32114	1.5122	1.32927	1.68293	1.10569	1.2561	0.987805	1.66667	0.768293	1.57317	0.585366	1.35366	0.54878	1.13821
1247	Bergerakoenigii	female	brown	1.08943	1.17886	1.60569	1.37398	1.69106	1.53252	1.34146	1.14634	1.89024	1.02846	1.89431	0.857724	2.13008	1.29268	2.34959	0.890244	2.52033	0.99187	2.64634	1.18293	2.67886	1.45122
1248	Bergerakoenigii	female	brown	0.987805	1.19106	1.48374	1.34959	1.59756	1.50813	1.19512	1.14228	1.80488	0.955285	1.79268	0.780488	2.0813	1.21138	2.22764	0.756098	2.39024	0.821138	2.58943	1.09756	2.65041	1.31301	0.212979	0.637784	0.888869	0.175222	0.467338	0.520722	1.16724	-0.671664	-0.195326	-0.0511621	-0.756412	-0.330369	-0.283394	0.0671602
1249	Bergerakoenigii	female	brown	1.22358	1.09756	1.7439	1.01626	1.84959	0.882114	1.43496	1.17886	1.96748	1.41057	1.93089	1.5813	2.2439	1.21138	2.36585	1.63008	2.5122	1.57724	2.71951	1.38211	2.79268	1.13821
1251	Bergerakoenigii	female	brown	0.971545	1.06911	1.50813	0.99187	1.61382	0.857724	1.21545	1.15041	1.72764	1.39024	1.71951	1.58537	2.03659	1.1748	2.13415	1.63821	2.29675	1.58537	2.52439	1.37805	2.60569	1.18293
1255	Bergerakoenigii	female	brown	0.930894	0.939024	1.50813	1.00813	1.68699	1.1626	1.19919	0.821138	1.81301	0.556911	1.77236	0.414634	2.10163	0.800813	2.1748	0.337398	2.34959	0.398374	2.63008	0.593496	2.71951	0.829268
1256	Bergerakoenigii	female	brown	0.918699	1.11382	1.44715	0.894309	1.57317	0.707317	1.16667	1.13415	1.84553	1.28049	1.84959	1.47561	2.05691	1.01626	2.26016	1.46341	2.43496	1.36179	2.64634	1.07724	2.69919	0.882114
1257	Bergerakoenigii	female	brown	1.08537	0.906504	1.55691	1.0813	1.57724	1.19106	1.27236	0.861789	1.81707	0.699187	1.80081	0.520325	2.08537	0.943089	2.23577	0.50813	2.38211	0.597561	2.54065	0.796748	2.60569	1.02439
1261	Bergerakoenigii	female	green	1.9878	1.2561	1.54065	0.99187	1.49593	0.817073	1.73984	1.28049	1.19106	1.30081	1.13008	1.45935	1.04065	1.01626	0.813008	1.35772	0.719512	1.26423	0.626016	1.12195	0.495935	0.934959
1262	Bergerakoenigii	female	brown	1.15041	1.45122	1.49593	1.09756	1.46341	0.939024	1.39431	1.37398	1.89431	1.24797	1.96341	1.41057	1.99187	0.99187	2.26423	1.27236	2.37398	1.12195	2.43496	0.865854	2.37398	0.682927
1263	Bergerakoenigii	female	brown	1.60569	1.7561	2.03252	1.45122	2.17073	1.44309	1.69919	1.55691	1.90244	0.987805	1.76829	0.890244	2.22764	0.95122	2.02846	0.544715	2.21138	0.455285	2.52846	0.434959	2.68699	0.552846
1265	Bergerakoenigii	female	brown	1.39837	1.66667	1.95122	1.60976	2.13008	1.70732	1.58943	1.53252	2.06911	1.13415	2.01626	0.963415	2.4065	1.26423	2.38618	0.776423	2.59756	0.776423	2.89837	0.930894	3.00407	1.12602
1269	Bergerakoenigii	female	brown	1.42276	2.00813	1.65447	1.46748	1.8252	1.34553	1.39431	1.7439	1.26423	1.04878	1.09756	1.04878	1.57724	0.837398	1.10569	0.646341	1.24797	0.45122	1.55285	0.235772	1.75203	0.215447
1270	Bergerakoenigii	female	green	1.49187	0.630081	1.50407	1.26423	1.39024	1.44309	1.61382	0.873984	2.02846	1.43496	2.16667	1.38618	1.82927	1.74797	2.28455	1.79675	2.26829	1.96748	2.08943	2.26016	1.89024	2.35366
1271	Bergerakoenigii	female	brown	1.87398	1.95935	1.85772	1.37805	1.94309	1.1626	1.74797	1.75203	1.36179	1.15447	1.19919	1.21951	1.55285	0.841463	1.04878	0.784553	1.06504	0.589431	1.2439	0.317073	1.42276	0.219512
1273	Bergerakoenigii	female	brown	1.26829	1.33333	1.86992	1.31707	2.08537	1.45935	1.5122	1.19919	2.06504	0.784553	1.97967	0.609756	2.40244	0.979675	2.44715	0.479675	2.6626	0.52439	2.95528	0.715447	3.05285	0.878049
1275	Citrustaiwanica	female	green	1.25203	1.1748	1.76016	1.03659	1.89024	0.878049	1.47967	1.21545	2.04878	1.4187	2.01626	1.57317	2.30081	1.17073	2.43496	1.60976	2.60163	1.54065	2.8252	1.30081	2.84959	1.03252
1277	Citrustaiwanica	female	green	1.09756	1.30081	1.60976	1.10976	1.67073	0.95935	1.31301	1.32927	1.93089	1.4878	1.9187	1.63415	2.15854	1.19512	2.3252	1.63415	2.5122	1.53252	2.69512	1.28049	2.72358	1.04065
1278	Citrustaiwanica	female	brown	1.0813	1.54878	1.54065	1.36585	1.63821	1.22764	1.30081	1.5813	1.86585	1.69919	1.85366	1.85772	2.06911	1.45935	2.25203	1.83333	2.41463	1.72764	2.55691	1.51626	2.61789	1.30894
1284	Citrustaiwanica	female	brown	1.07317	1.2561	1.54472	1.05285	1.62602	0.910569	1.30894	1.27642	1.86179	1.39431	1.84959	1.53659	2.07724	1.13415	2.26829	1.50813	2.4065	1.4065	2.56098	1.1748	2.57724	0.955285
1286	Citrustaiwanica	female	brown	2.29675	1.47561	1.80488	1.22764	1.7561	1.11789	2.02033	1.47154	1.47154	1.54878	1.47154	1.69106	1.31301	1.27642	1.07724	1.61789	0.934959	1.52033	0.821138	1.29268	0.841463	1.10163
1288	Citrustaiwanica	female	brown	2.14228	1.27642	1.70732	1.04065	1.6626	0.918699	1.91463	1.29268	1.40244	1.36179	1.40244	1.50813	1.21545	1.11789	1.01626	1.44309	0.898374	1.35366	0.792683	1.13415	0.829268	0.869919
1289	Citrustaiwanica	female	brown	1.23984	1.36585	1.71138	1.13821	1.76423	0.987805	1.49593	1.39431	2.06504	1.46748	2.06911	1.62195	2.29675	1.20732	2.47967	1.58943	2.60976	1.47967	2.76423	1.21951	2.78049	1.02033
1291	Citrustaiwanica	female	green	1.11382	1.45935	1.55691	1.19919	1.59756	1.03659	1.3374	1.45935	1.90244	1.52033	1.93496	1.67073	2.10163	1.21545	2.31301	1.60163	2.46748	1.46748	2.58537	1.1748	2.55285	0.939024
1293	Citrustaiwanica	female	brown	1.18699	1.23171	1.63415	1.04065	1.71951	0.873984	1.43089	1.24797	1.97967	1.34553	1.97561	1.47967	2.15041	1.08537	2.36992	1.42683	2.5122	1.32927	2.63821	1.0935	2.63008	0.882114
1295	Citrustaiwanica	female	brown	0.987805	1.19919	1.37805	0.987805	1.40244	0.849593	1.22358	1.20732	1.7439	1.29268	1.80081	1.42276	1.94309	1.00813	2.15447	1.34146	2.29675	1.21545	2.41463	0.979675	2.39431	0.760163
1297	Citrustaiwanica	female	green	0.804878	1.07317	1.22764	0.873984	1.28455	0.727642	1.04472	1.08943	1.53659	1.18293	1.56911	1.33333	1.76423	0.926829	1.93496	1.27236	2.06911	1.1626	2.20732	0.930894	2.19919	0.727642
1299	Citrustaiwanica	female	brown	1.89837	1.25203	1.47154	1.07724	1.4065	0.943089	1.65447	1.28049	1.15447	1.38211	1.15854	1.52033	0.96748	1.15854	0.788618	1.4878	0.674797	1.4065	0.544715	1.18699	0.556911	0.96748
1301	Citrustaiwanica	female	brown	1.0935	1.29268	1.53659	1.10569	1.60163	0.955285	1.31301	1.30894	1.86992	1.37805	1.89431	1.52033	2.07724	1.15041	2.2561	1.49593	2.39837	1.40244	2.55691	1.17073	2.55691	0.934959
1303	Citrustaiwanica	female	green	1.34146	1.15041	1.76016	0.934959	1.79268	0.788618	1.5813	1.16667	2.10569	1.21545	2.13415	1.35366	2.28862	0.934959	2.4878	1.26423	2.60163	1.14228	2.69512	0.930894	2.68699	0.699187
1305	Citrustaiwanica	female	brown	1.08943	1.10976	1.5122	0.95122	1.59756	0.829268	1.30488	1.15447	1.78455	1.30081	1.79268	1.44309	1.99187	1.05691	2.15041	1.43089	2.29268	1.34553	2.46341	1.10569	2.47561	0.902439
1307	Citrustaiwanica	female	brown	1.64228	1.29268	2.10976	1.11789	2.19512	0.95935	1.88618	1.32927	2.36585	1.44309	2.36585	1.58537	2.62602	1.18699	2.77236	1.55691	2.94715	1.47154	3.08537	1.23577	3.08943	1.04065
1309	Citrustaiwanica	female	green	1.04472	1.07317	1.49593	0.894309	1.57317	0.760163	1.26423	1.10976	1.80894	1.23171	1.80894	1.39024	1.97967	0.98374	2.16667	1.36179	2.31707	1.27642	2.47967	1.04472	2.49187	0.833333
1314	Citrustaiwanica	female	brown	2.23984	1.2439	1.84146	1.0122	1.78862	0.886179	2.02439	1.26016	1.48374	1.31301	1.44715	1.43902	1.3252	1.02439	1.10976	1.34553	0.987805	1.21545	0.878049	0.99187	0.894309	0.788618
1316	Citrustaiwanica	female	brown	1.28455	1.21545	1.75203	1.07724	1.86992	0.947154	1.49187	1.28455	2.02033	1.50407	1.99593	1.65041	2.2439	1.26829	2.39024	1.67073	2.55285	1.60163	2.74797	1.38211	2.81301	1.20732
1317	Citrustaiwanica	female	brown	1.20325	1.19919	1.76423	1.08943	1.87805	0.934959	1.42683	1.26829	2.00813	1.50407	1.99187	1.68293	2.27236	1.26423	2.38211	1.67886	2.56911	1.58943	2.76423	1.37805	2.80894	1.20325
1318	Citrusmacrophylla	female	brown	2.07927	1.34146	1.53659	1.12195	1.42683	0.993902	1.81098	1.38415	1.21341	1.54268	1.23171	1.72561	0.932927	1.28659	0.804878	1.72561	0.628049	1.64634	0.396341	1.39634	0.359756	1.15244
1319	Citrusmacrophylla	female	brown	1.86585	1.14024	1.34146	1.12195	1.2561	1.0122	1.62805	1.26829	1.14024	1.56707	1.17683	1.7378	0.890244	1.41463	0.817073	1.86585	0.646341	1.82317	0.45122	1.65854	0.347561	1.43902
1320	Citrusmacrophylla	female	green	2.62805	1.37805	2.14634	1.2622	2.05488	1.13415	2.39024	1.44512	1.87805	1.64634	1.91463	1.79268	1.59756	1.42073	1.46951	1.84756	1.28659	1.78659	1.06098	1.57927	1.02439	1.36585
1321	Citrusmacrophylla	female	brown	0.817073	1.2622	1.29878	1.03049	1.34756	0.871951	1.04878	1.27439	1.7378	1.36585	1.69512	1.53049	1.93293	1.08537	2.10976	1.5	2.28049	1.39024	2.46341	1.14634	2.46951	0.920732
1322	Citrusmacrophylla	female	green	2.35366	1.37805	1.85366	1.12805	1.76829	0.957317	2.09756	1.39024	1.40854	1.45122	1.40244	1.62805	1.21341	1.12805	0.993902	1.55488	0.804878	1.41463	0.640244	1.11585	0.634146	0.896341
1323	Citrusmacrophylla	female	green	0.768293	1.20122	1.29878	1.46341	1.37195	1.59756	1.03659	1.18902	1.69512	1.09146	1.70122	0.926829	1.92683	1.38415	2.11585	0.987805	2.27439	1.09756	2.46951	1.36585	2.45732	1.62195
1324	Citrusmacrophylla	female	brown	0.664634	1.32927	1.18293	1.41463	1.28659	1.54878	0.859756	1.23171	1.45122	0.993902	1.42073	0.841463	1.7378	1.21341	1.85366	0.77439	2.03049	0.847561	2.2378	1.03659	2.28659	1.2622
1325	Citrusmacrophylla	female	brown	2.07927	1.41463	1.61585	1.09756	1.56098	0.914634	1.81098	1.39024	1.18293	1.36585	1.16463	1.54268	1.01829	1.04268	0.719512	1.41463	0.585366	1.29268	0.45122	1.01829	0.463415	0.768293
1326	Citrusmacrophylla	female	green	2.18902	1.04878	1.67683	0.932927	1.56098	0.762195	1.96341	1.12805	1.29268	1.35366	1.35976	1.51829	1.01829	1.09146	0.871951	1.57317	0.695122	1.47561	0.457317	1.23171	0.414634	0.981707
1327	Citrusmacrophylla	female	brown	2.43293	1.56098	1.85976	1.55488	1.7561	1.67683	2.18902	1.43293	1.63415	1.10976	1.65854	0.939024	1.32927	1.29878	1.25	0.847561	1.08537	0.896341	0.817073	1.10976	0.743902	1.34146
1328	Citrusmacrophylla	female	brown	1.33537	0.926829	1.81707	1.15244	1.91463	1.28659	1.61585	0.896341	2.21951	0.804878	2.22561	0.646341	2.45732	1.10976	2.64634	0.676829	2.83537	0.804878	2.9878	1.06707	2.97561	1.31098
1329	Citrusmacrophylla	female	brown	1	1.54268	1.5122	1.60976	1.64634	1.75	1.2622	1.45122	1.80488	1.21951	1.7622	1.06098	2.06707	1.43293	2.18902	0.993902	2.34756	1.04268	2.62805	1.29878	2.65854	1.5
1330	Citrusmacrophylla	female	brown	0.926829	0.939024	1.47561	0.896341	1.65854	0.743902	1.13415	1.03049	1.76829	1.37195	1.71341	1.54268	2.09756	1.14634	2.16463	1.63415	2.37805	1.56098	2.64024	1.37195	2.73171	1.11585
1331	Citrusmacrophylla	female	brown	2.09146	1.54878	1.54268	1.53049	1.37805	1.67073	1.89634	1.43293	1.39024	1.07927	1.43293	0.908537	1.08537	1.25	1.01829	0.756098	0.847561	0.792683	0.573171	0.939024	0.445122	1.18902
1332	Citrusmacrophylla	female	brown	2.47561	1.33537	1.96951	1.17073	1.86585	1.01829	2.23171	1.36585	1.59146	1.54878	1.60976	1.70122	1.34756	1.29268	1.20122	1.75	1.06098	1.67073	0.847561	1.42073	0.810976	1.23171
1333	Citrusmacrophylla	female	brown	1.09146	1.11585	1.57317	1.33537	1.67683	1.5061	1.35366	1.08537	1.98171	0.97561	1.95122	0.829268	2.20122	1.28049	2.40854	0.865854	2.55488	0.969512	2.7378	1.25	2.71951	1.46951
1334	Citrusmacrophylla	female	brown	0.993902	1.57927	1.4878	1.33537	1.59756	1.16463	1.23171	1.59146	1.89634	1.67683	1.91463	1.83537	2.11585	1.39024	2.36585	1.78049	2.51829	1.67683	2.67683	1.43293	2.70122	1.15854
1335	Citrusmacrophylla	female	brown	2.31098	1.35366	1.79268	1.41463	1.65854	1.53659	2.08537	1.26829	1.52439	0.981707	1.56098	0.829268	1.22561	1.18293	1.17073	0.75	0.939024	0.804878	0.72561	0.987805	0.670732	1.21341
1336	Citrusmacrophylla	female	brown	2.20122	1.18902	1.65244	1.06098	1.52439	0.908537	1.95732	1.2439	1.31098	1.46341	1.37195	1.62805	1.09146	1.22561	0.939024	1.64634	0.792683	1.58537	0.567073	1.32927	0.52439	1.09146
